# Supplementary material for: Engineering of a novel optimized platform for sublingual delivery with novel characterization tools: in vitro evaluation and in vivo pharmacokinetics study in human
Source: PubMed Central journal article supplement (PMC8241021; doi:10.1080/10717544.2017.1334719), 2017-06-09
Supplement: IDRD_A_1334719_SM2515.pdf [file IDRD_A_1334719_SM2515.pdf]

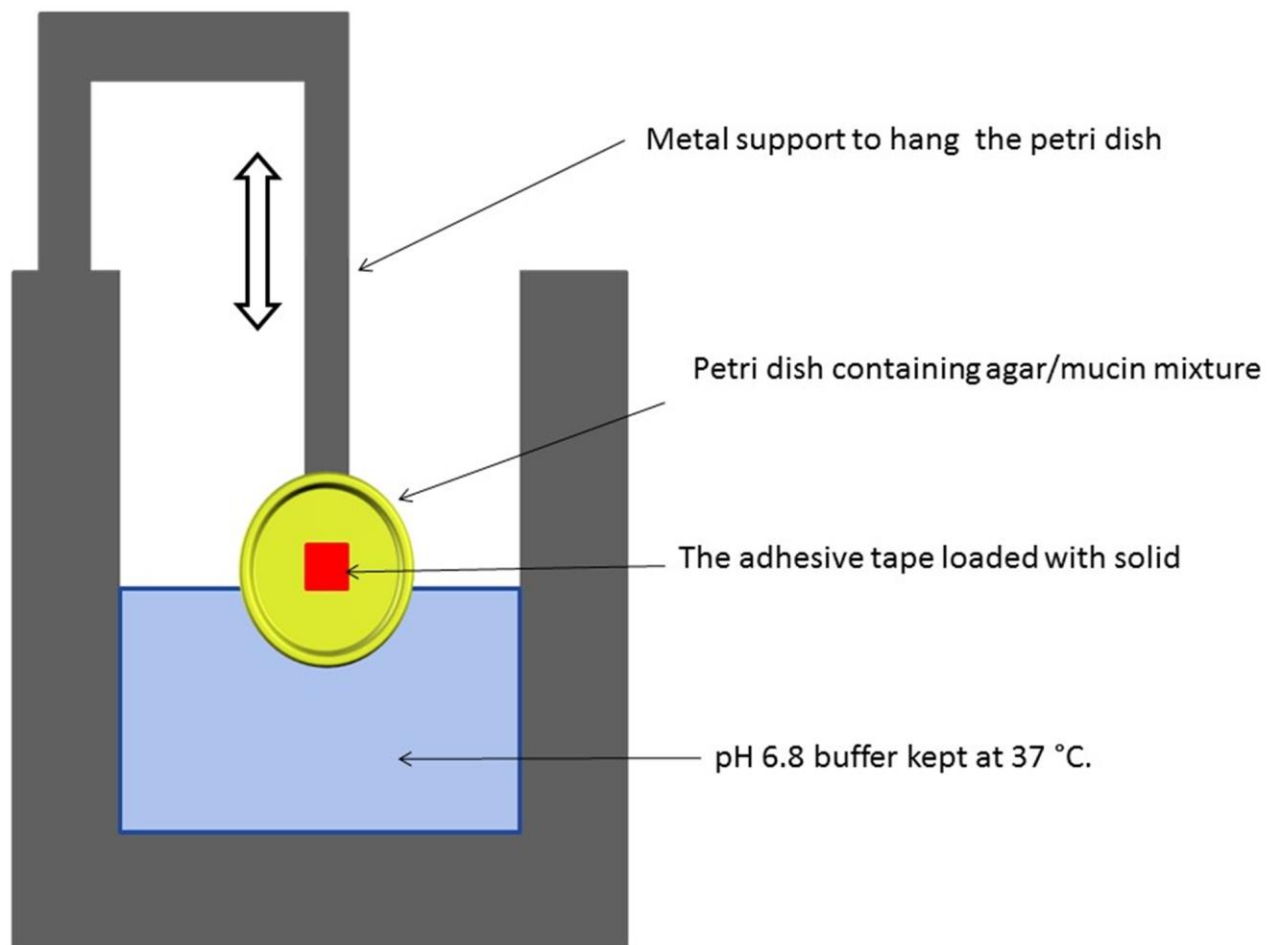

**Figure S1:** Modified disintegration apparatus for measurement of *in vitro* mucoadhesion time.

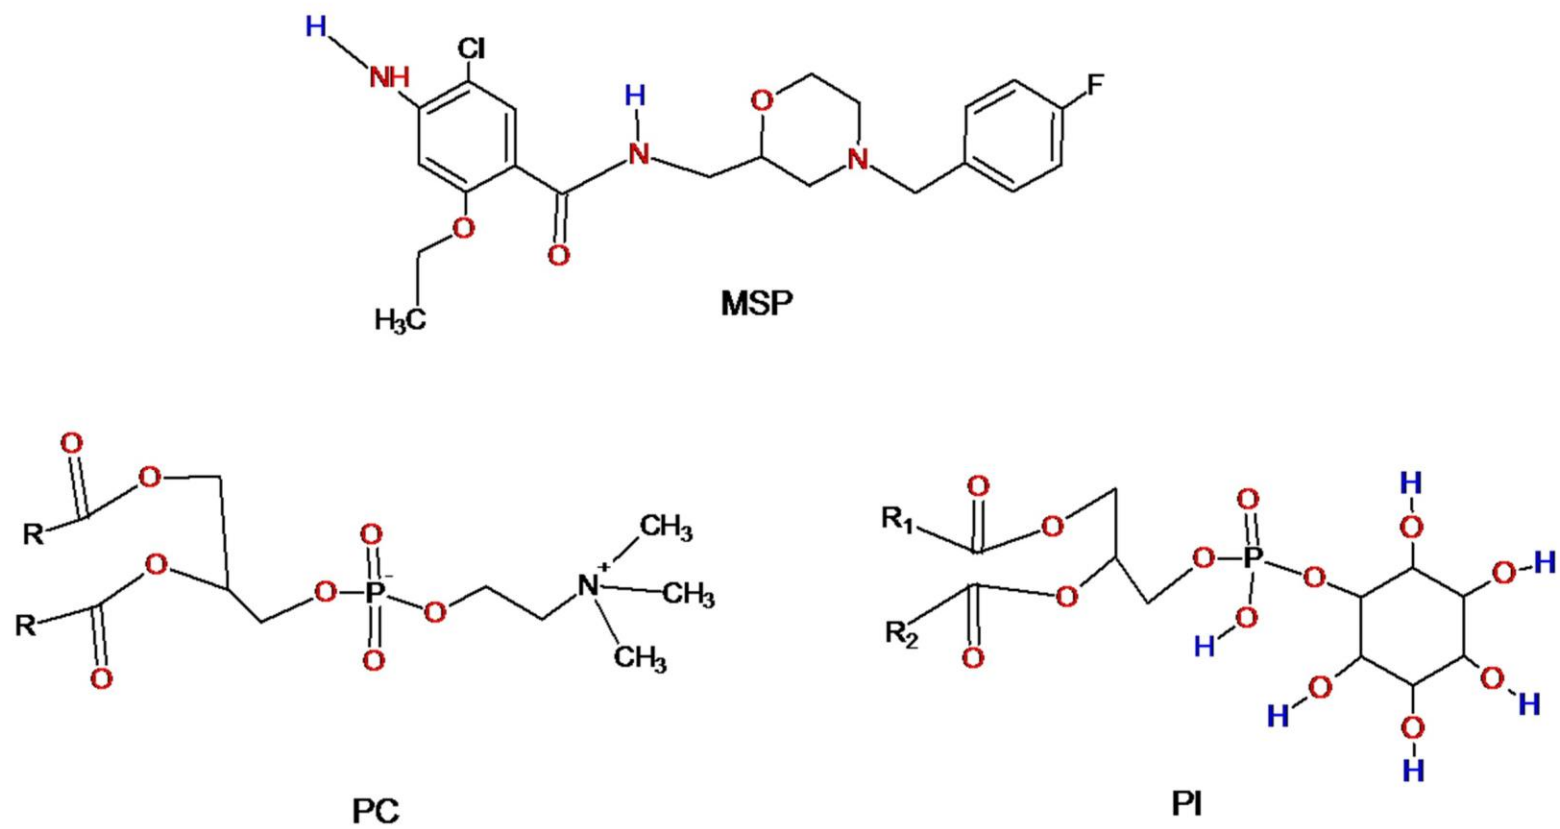

**Figure S2:** Mosapride (MSP), phosphatidylcholine (PC) and phosphatidylinositol (PI). Blue color indicates hydrogen donating atom or group and red color indicates hydrogen bond receptor atom or group.

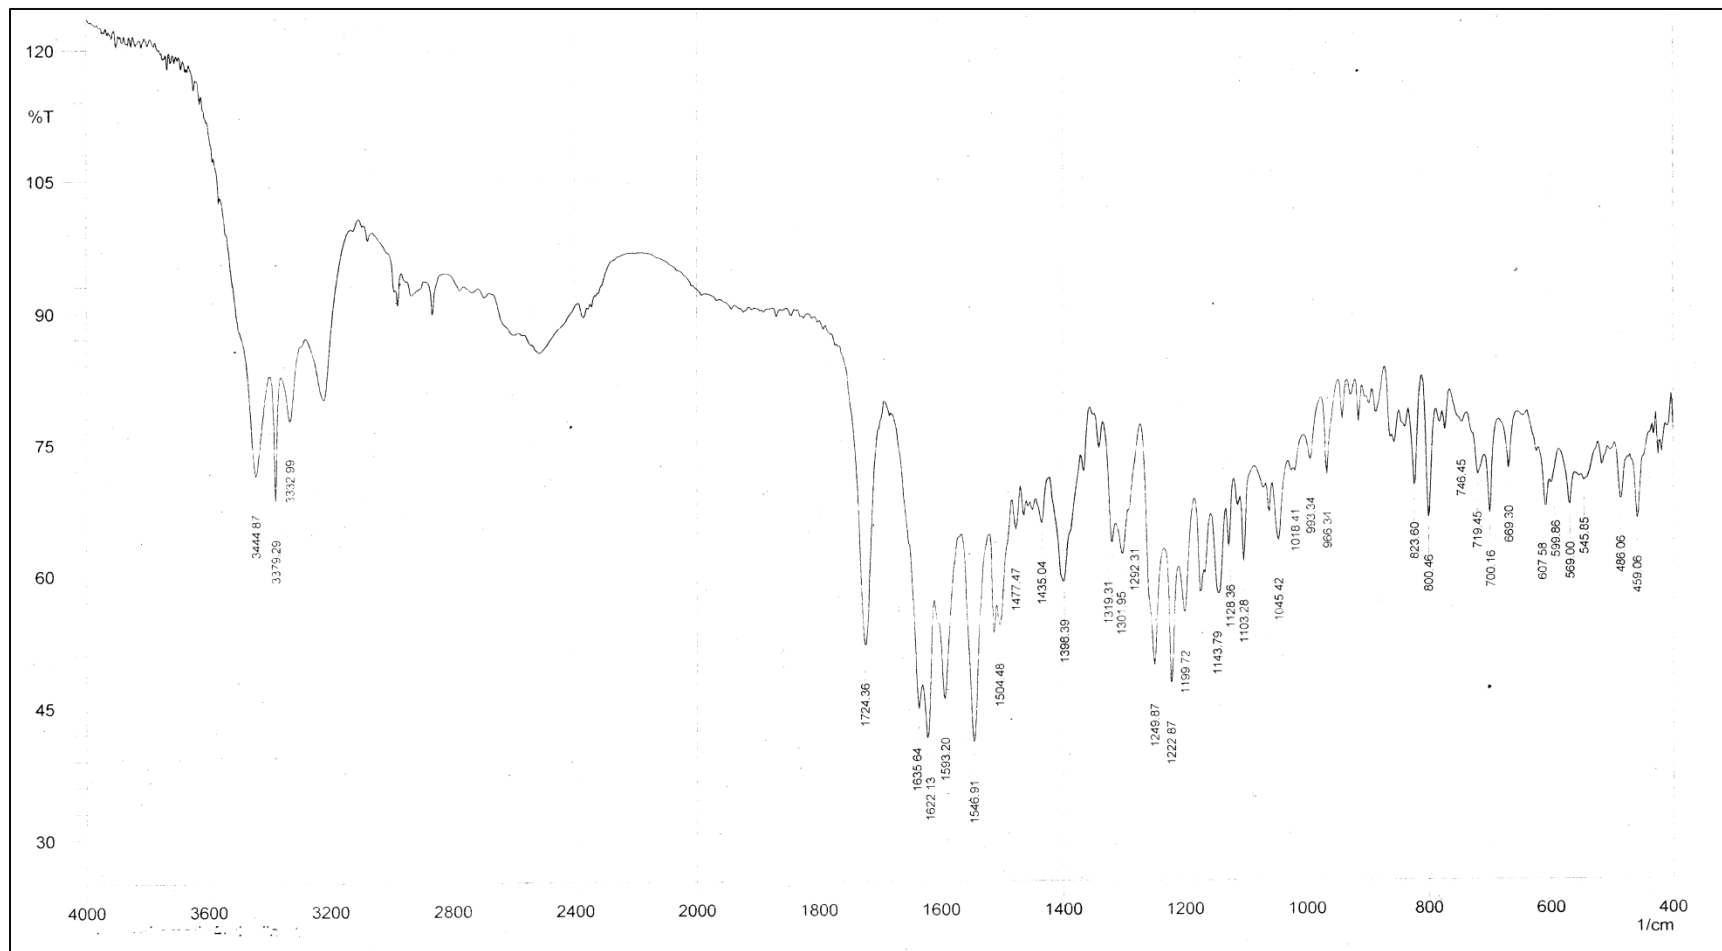

**Figure S3.** FTIR spectrum of MSP.

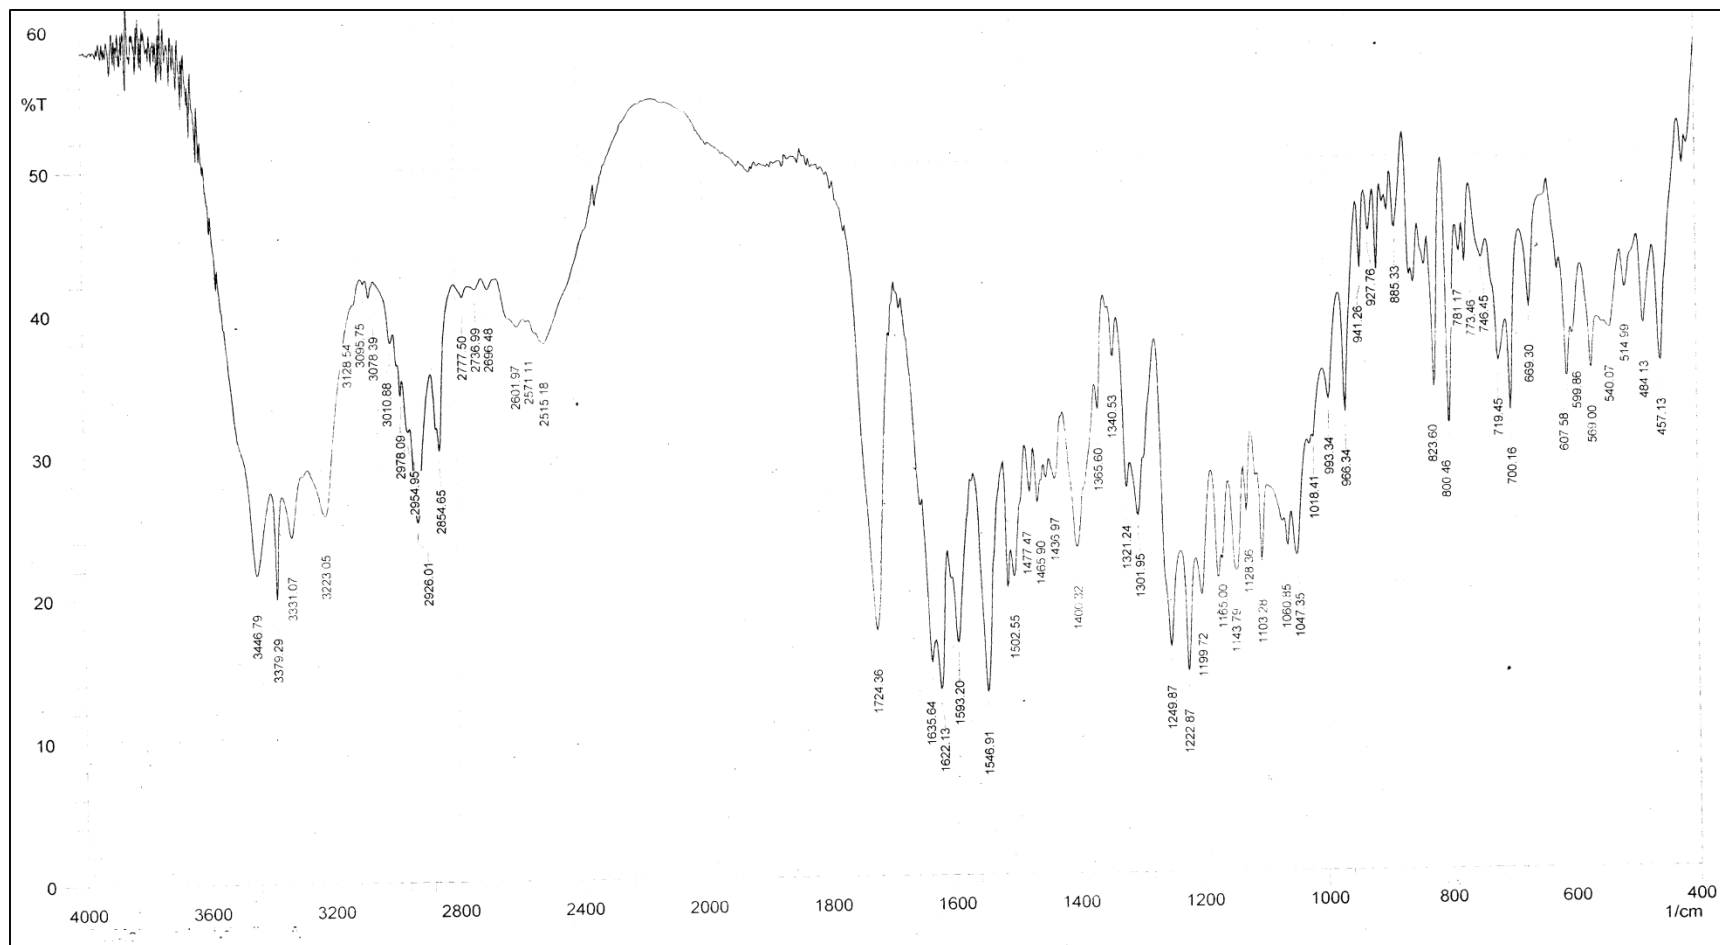

**Figure S4.** FTIR spectrum of physical mixture of MSP and SB1.

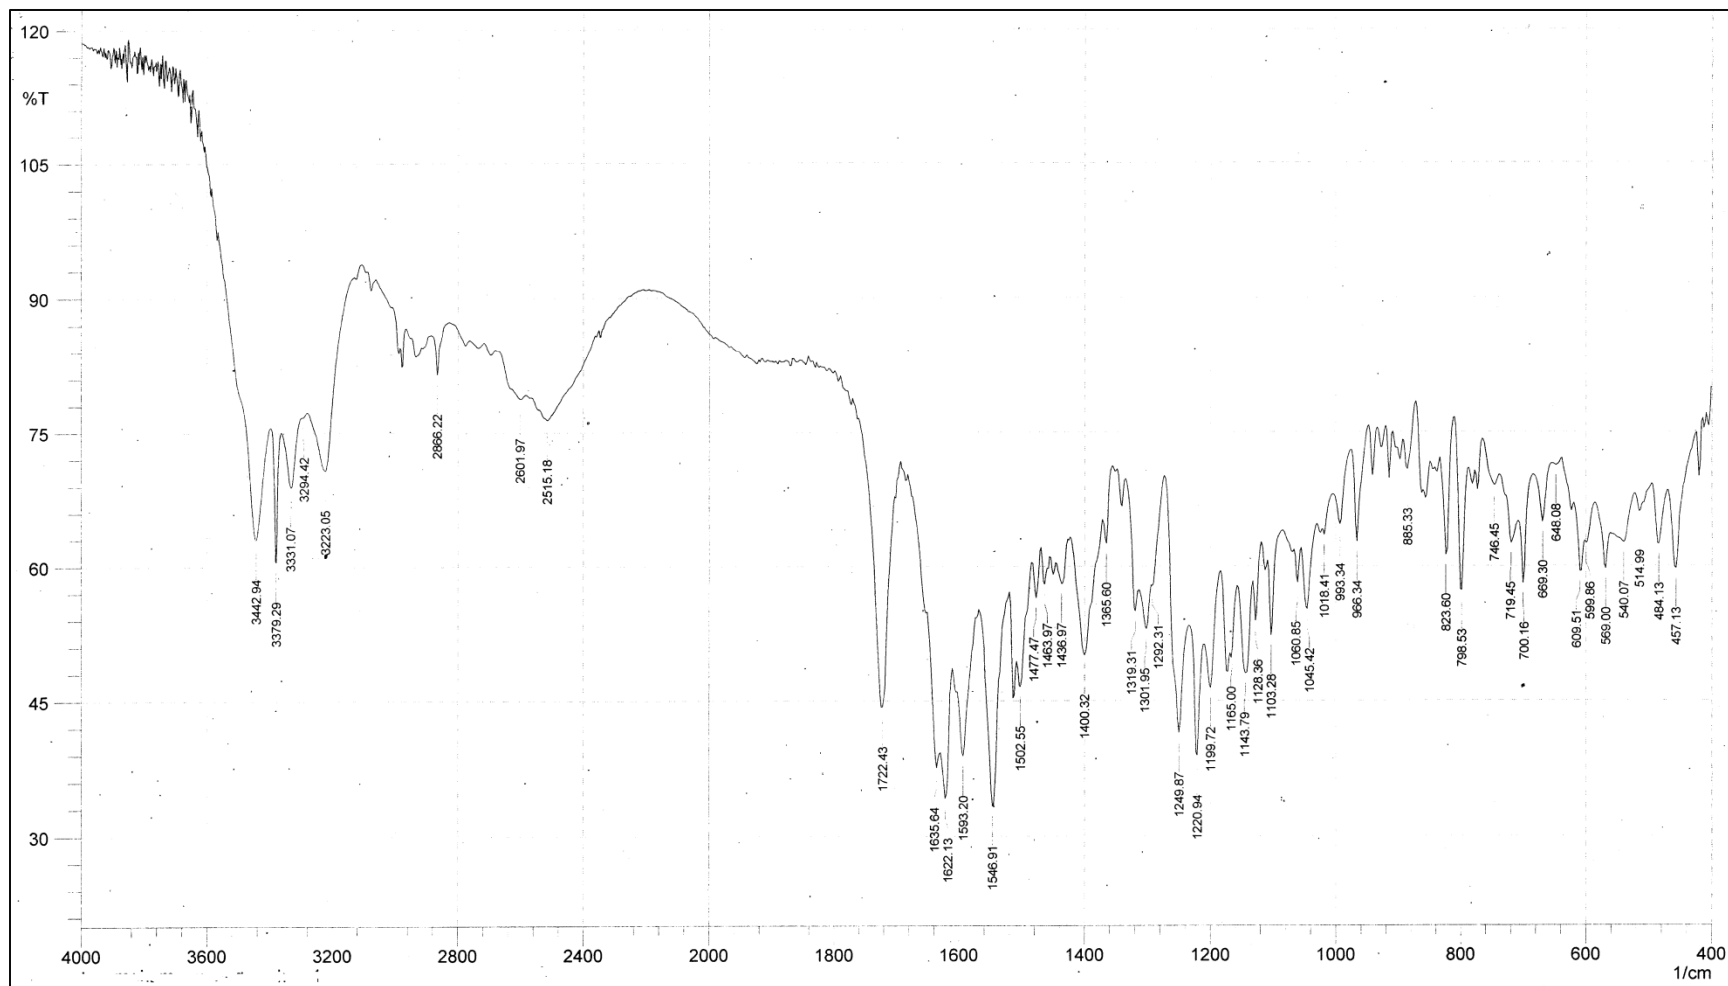

**Figure S5.** FTIR spectrum of physical mixture of MSP and SB2.

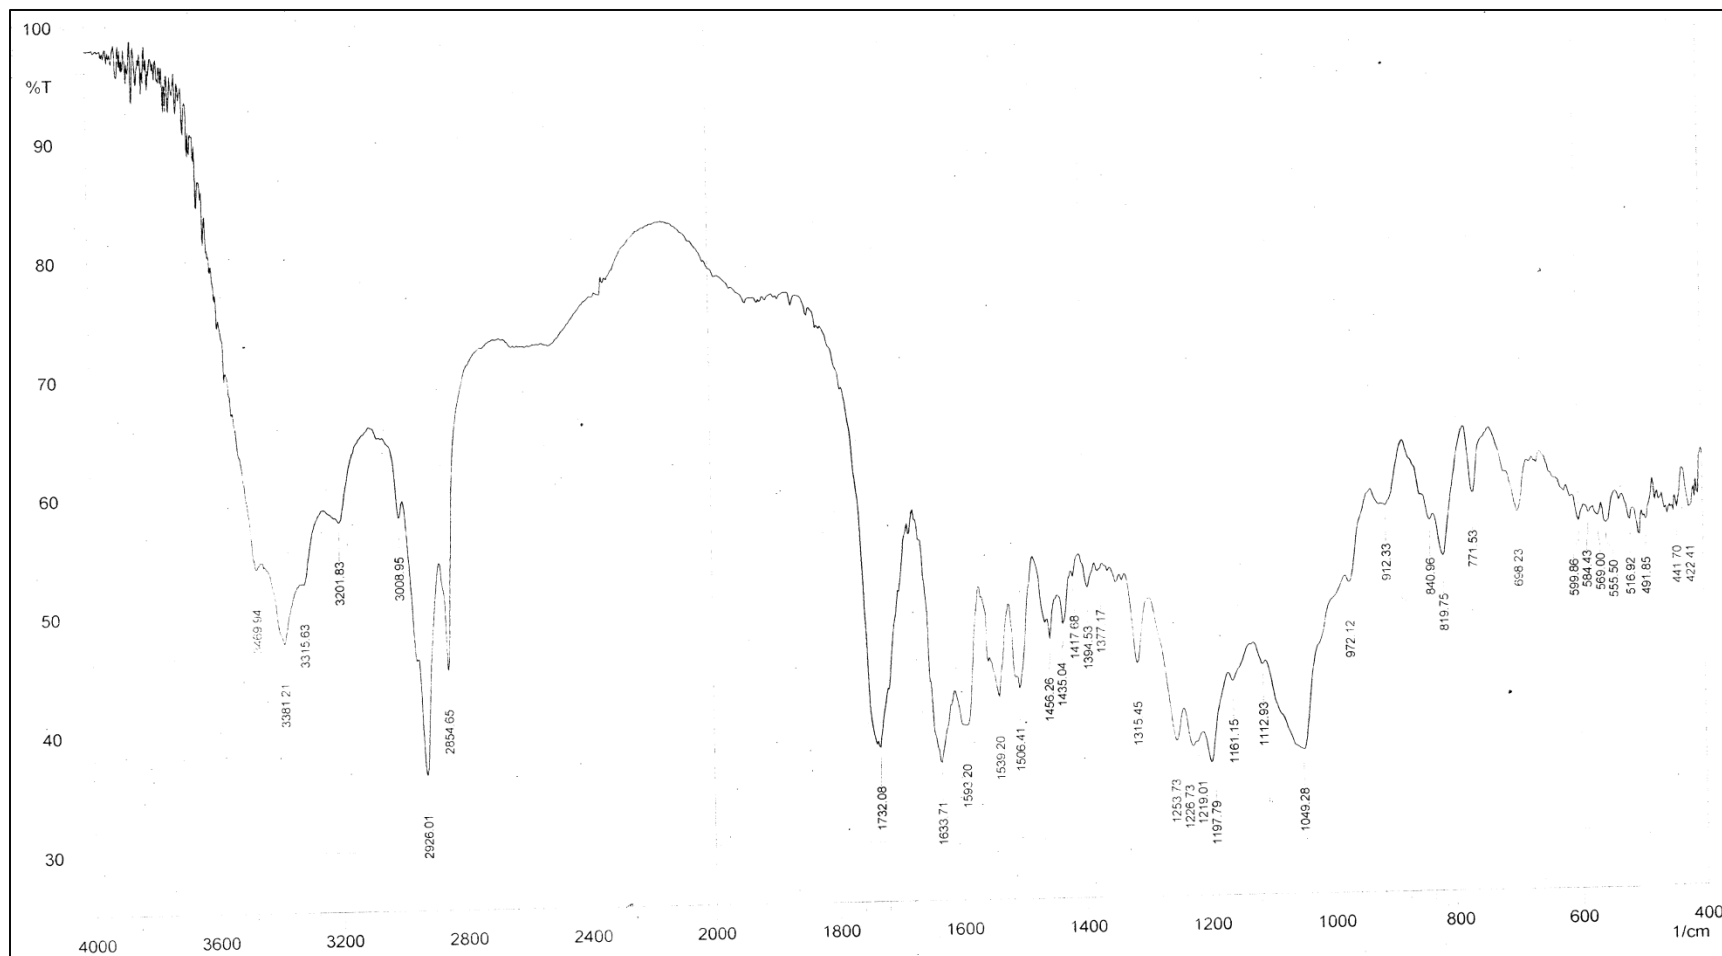

**Figure S6.** FTIR spectrum of CP1.

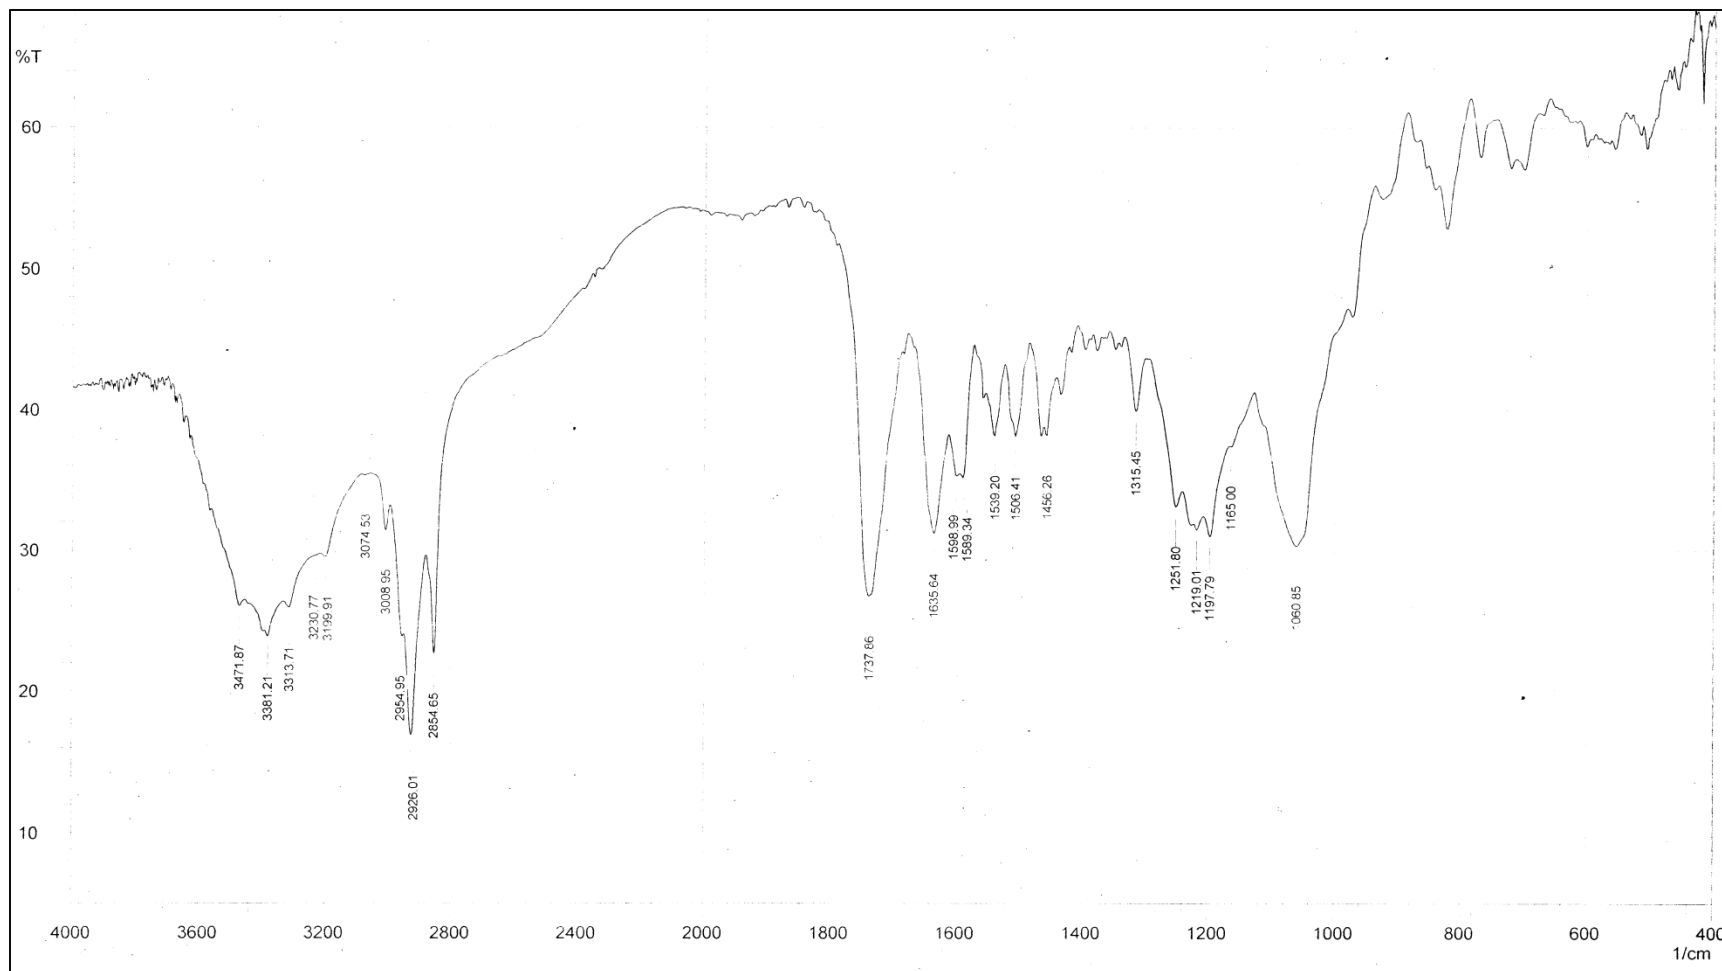

Figure S7. FTIR spectrum of CP2.

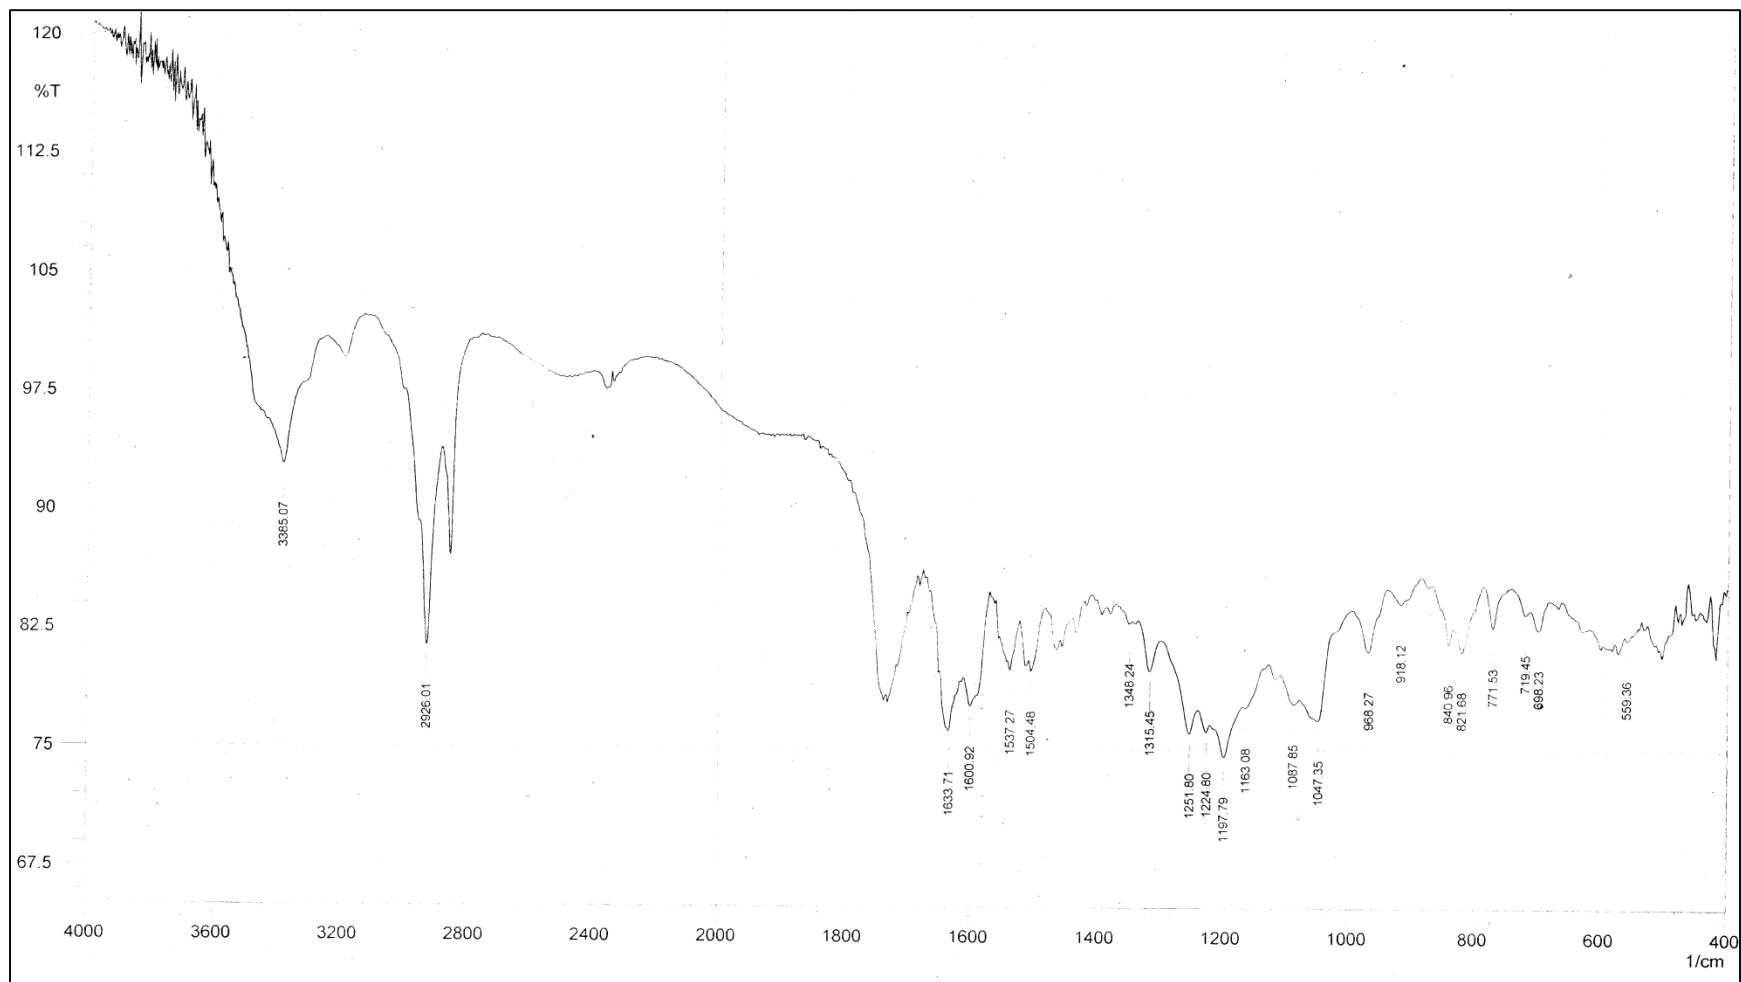

**Figure S8.** FTIR spectrum of CP3.



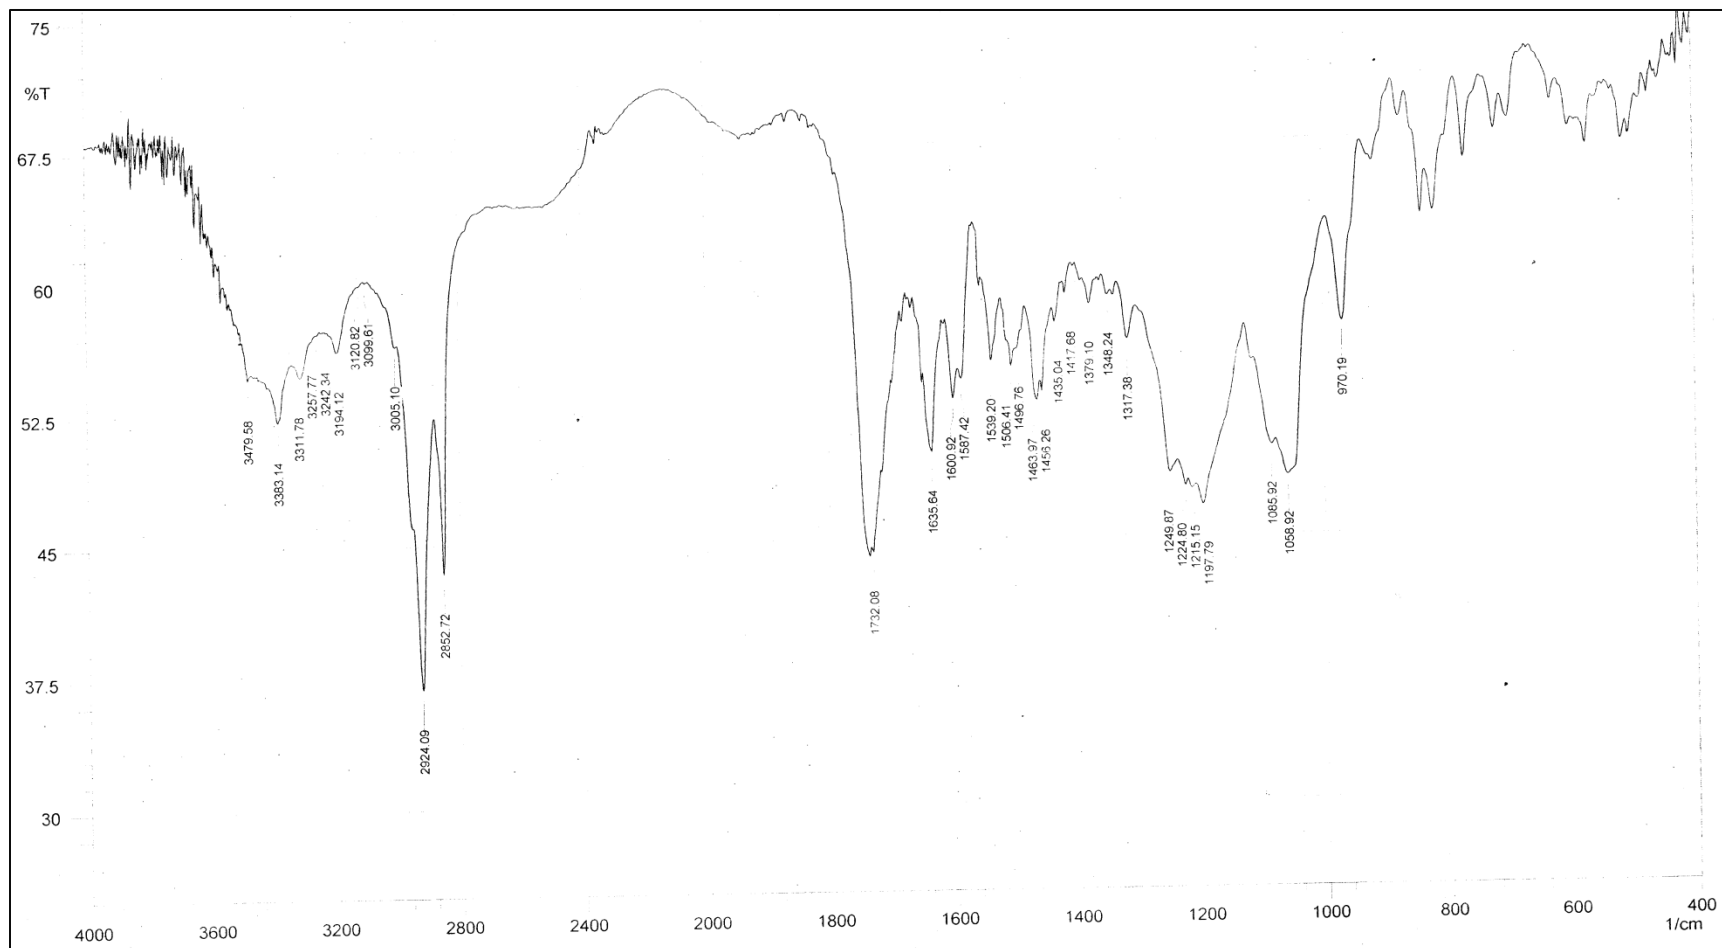

Figure S9. FTIR spectrum of CP4.

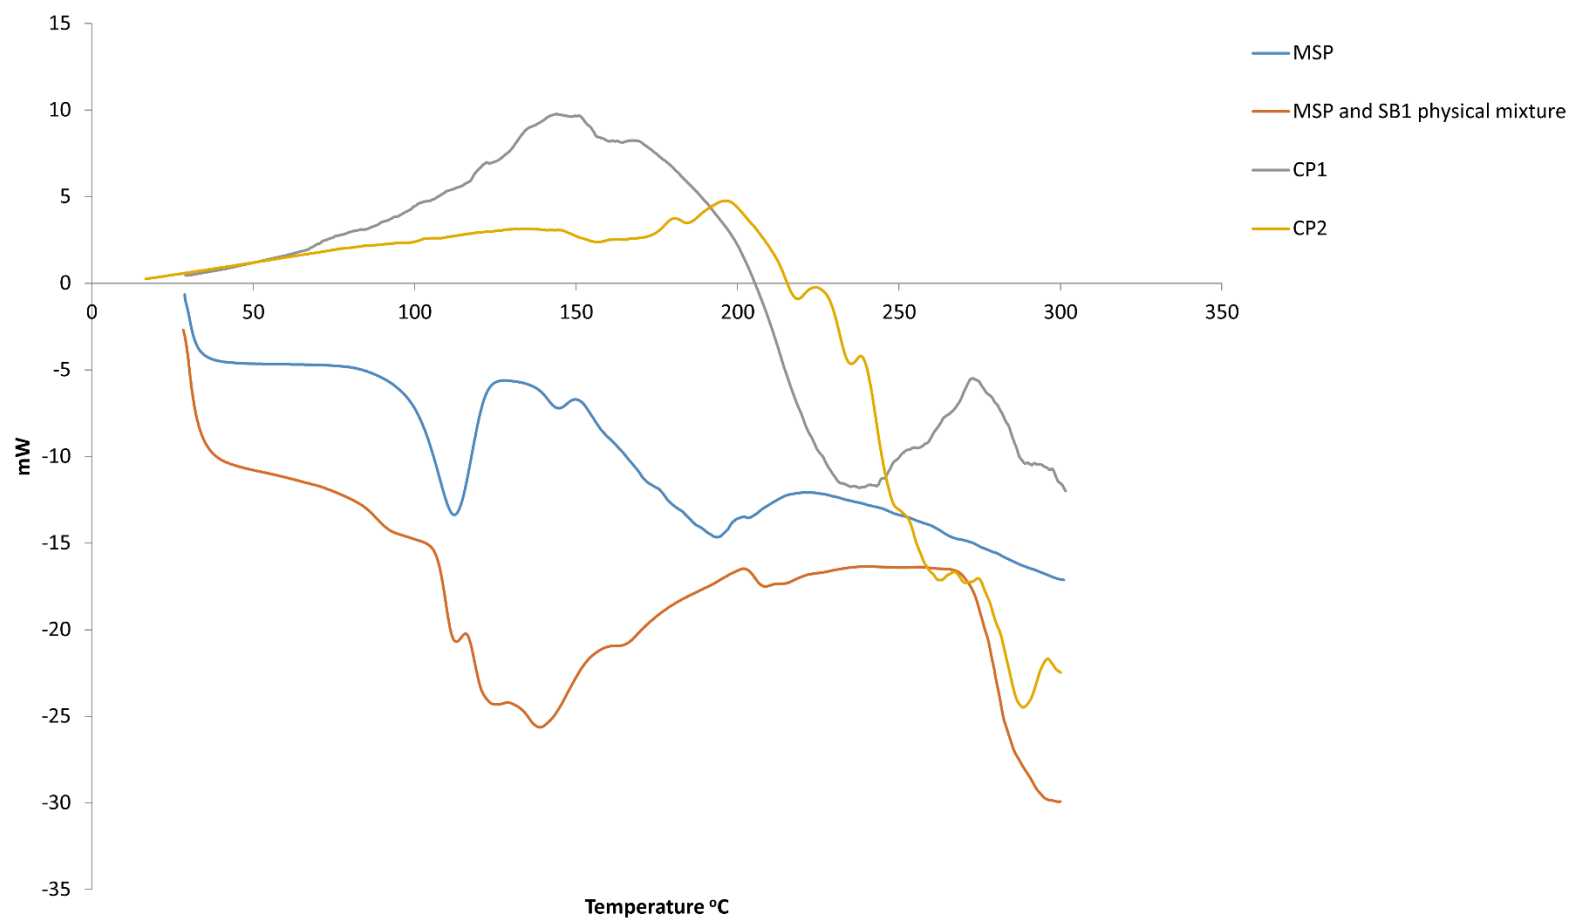

**Figure S10.** Differential scanning calorimetric (DSC) thermograms of MSP, MSP: SB1 physical mixture, CP1 and CP2.

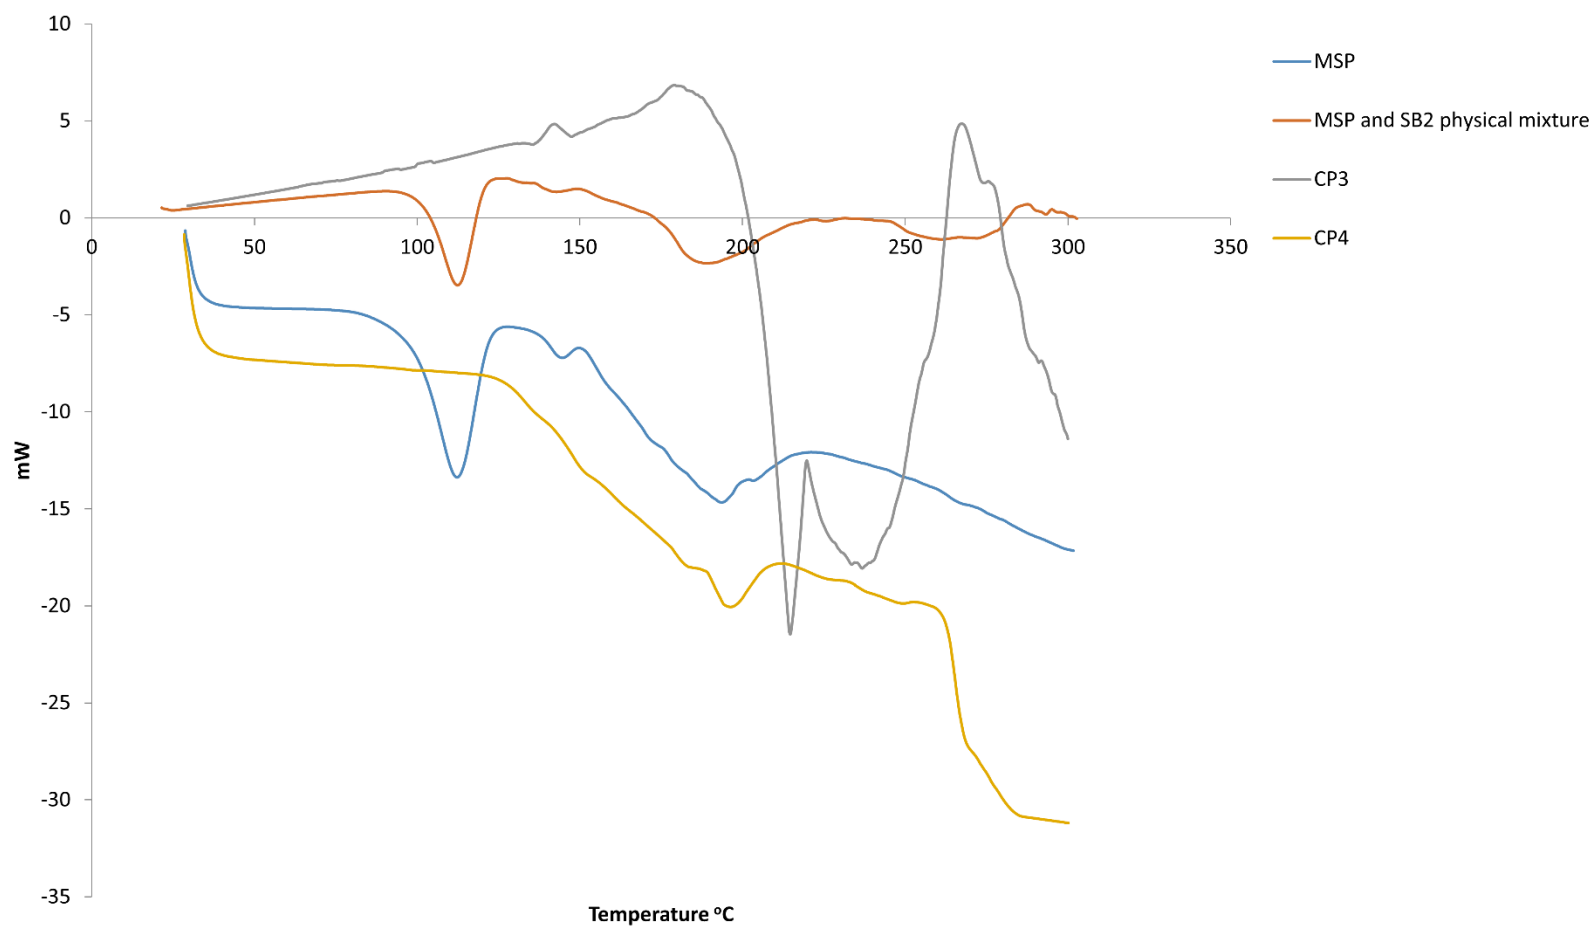

**Figure S11.** Differential scanning calorimetric (DSC) thermograms of MSP, MSP: SB2 physical mixture, CP3 and CP4.

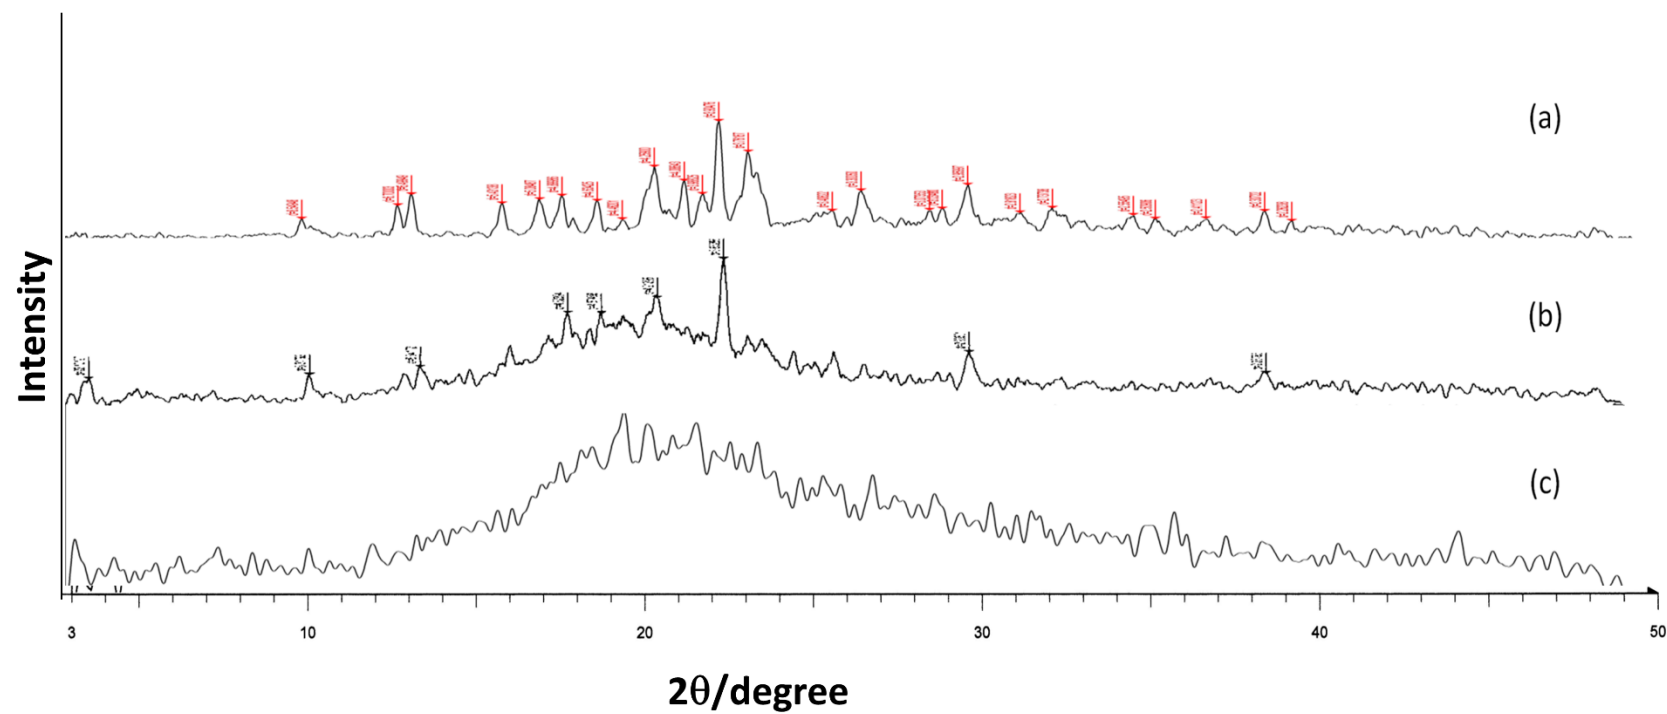

**Figure S12.** XRD of (a) pure MSP, (b) MSP and SB1 physical mixture, (c) CP1 and (d) CP2.

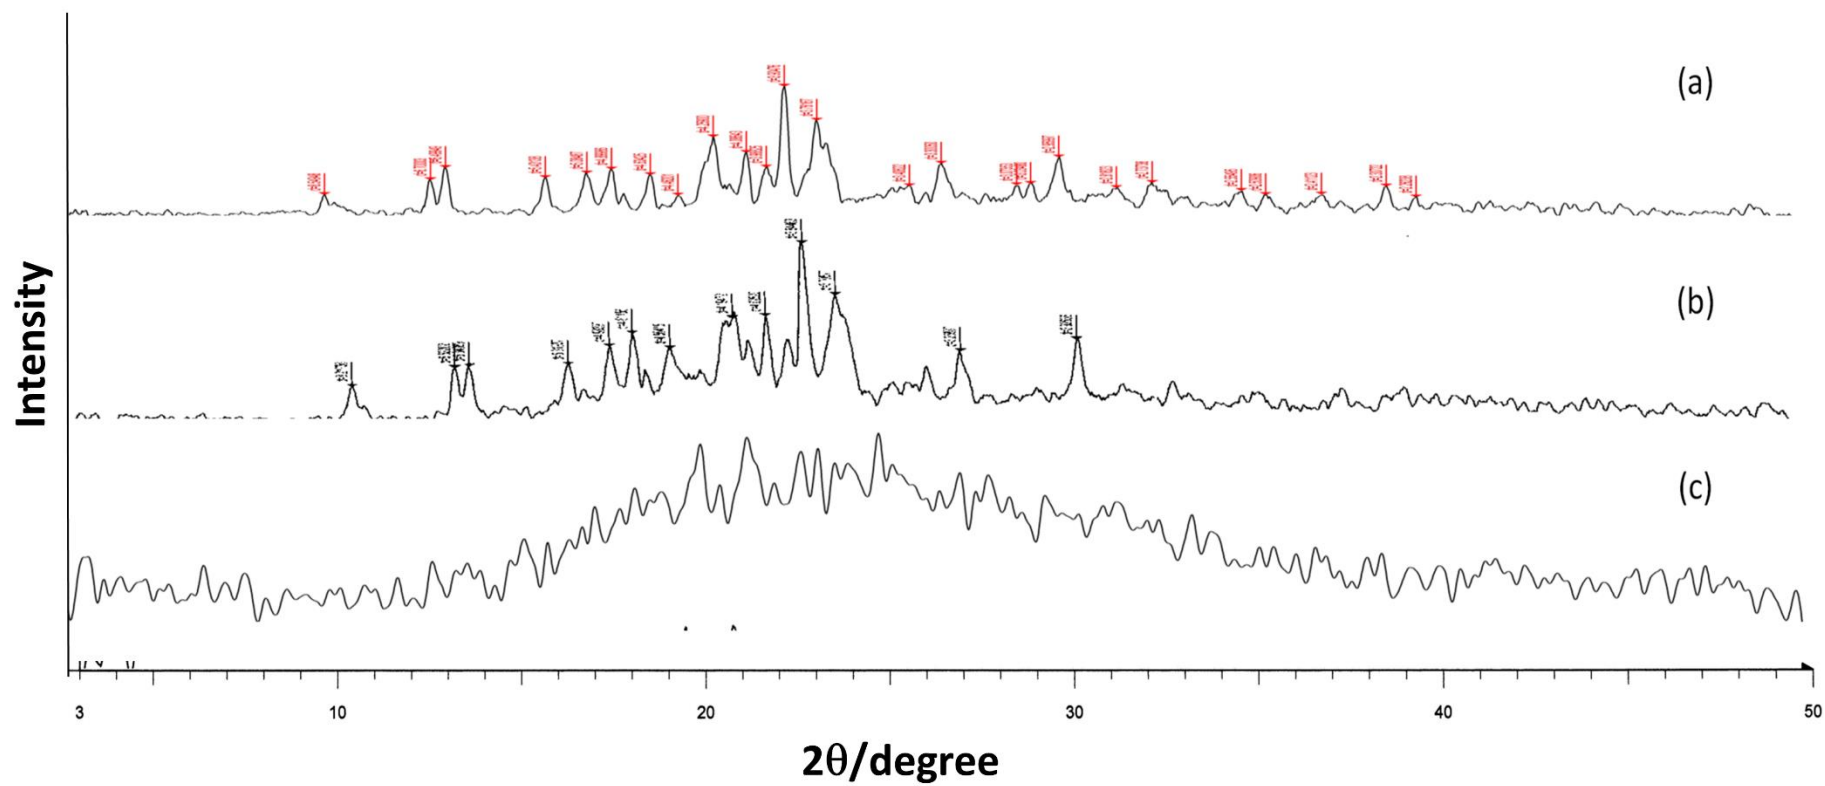

**Figure S13.** XRD of (a) pure MSP, (b) MSP and SB2 physical mixture, (c) CP3 and (d) CP4.

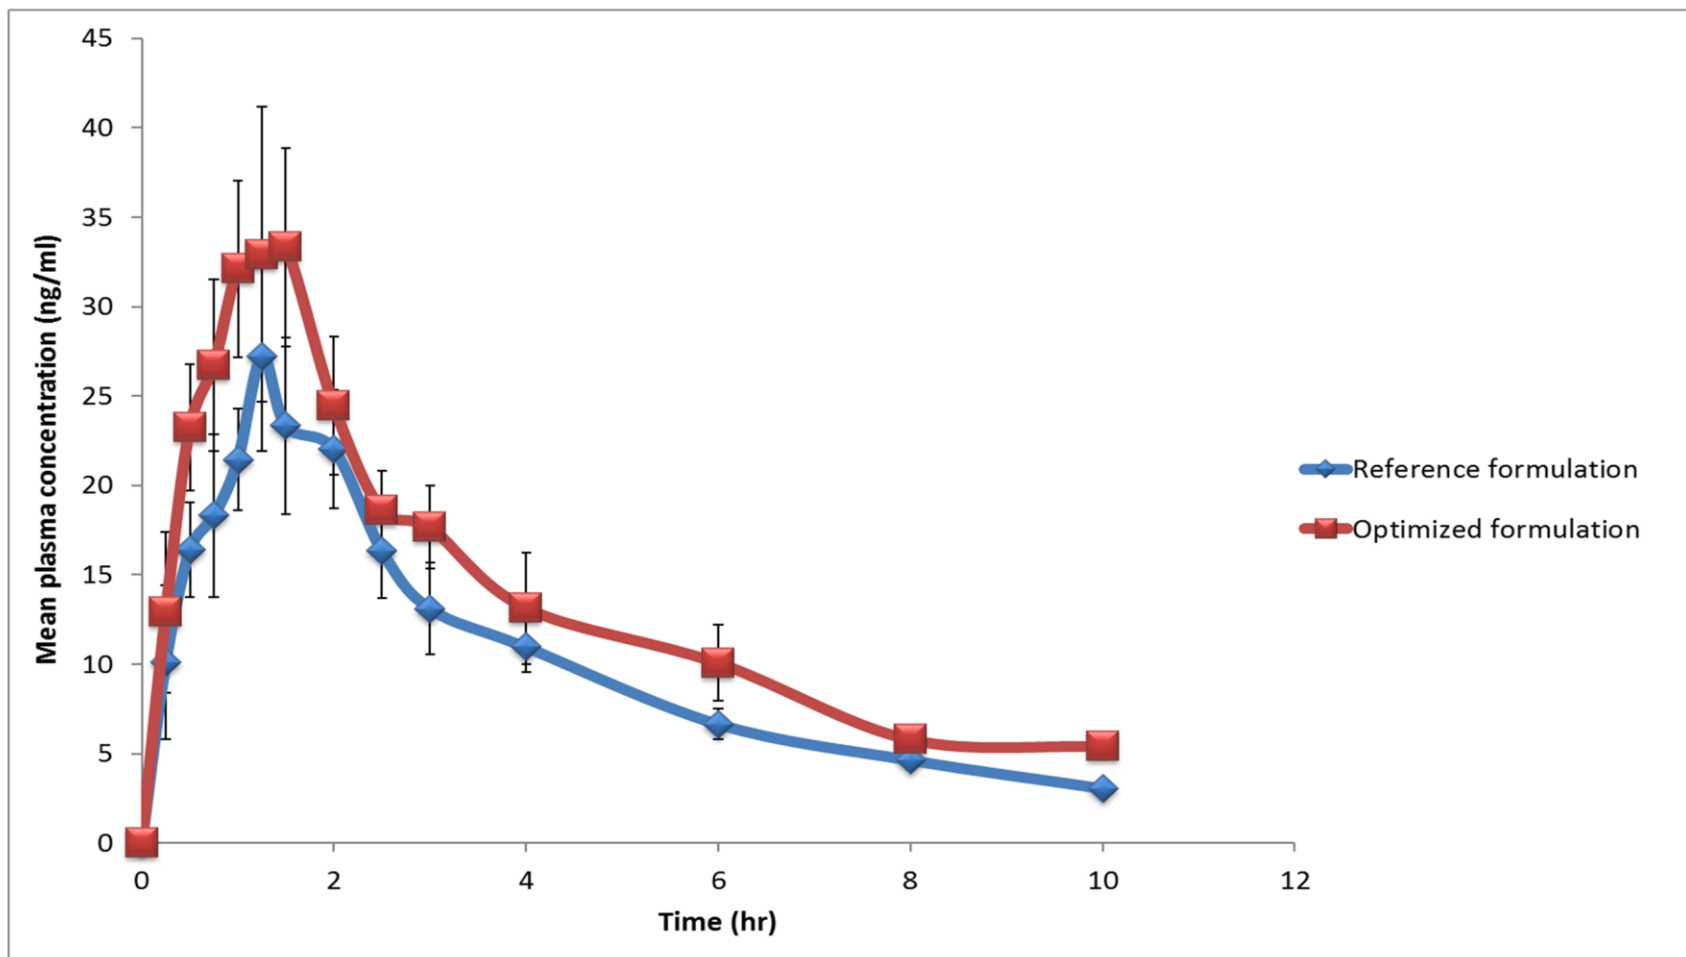

**Figure S14:** Mean plasma concentration time curve following the sublingual administration of the reference Fluxopride<sup>®</sup> tablets and the optimized test formulation.

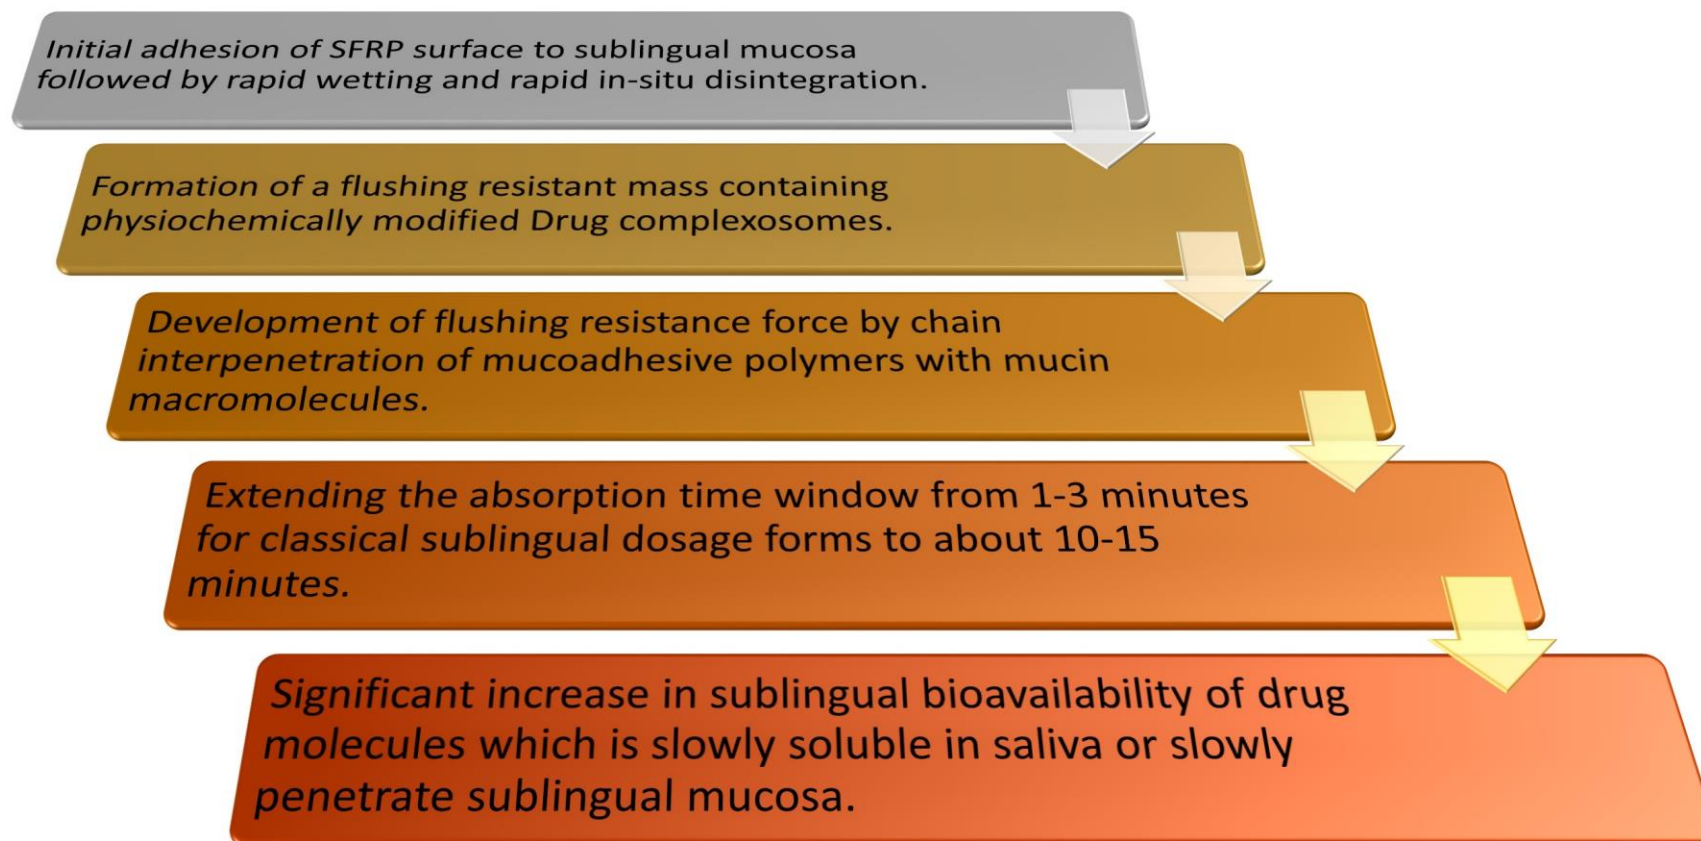

**Figure S15:** Mechanistic approach for in-situ formation of sublingual flushing resistant platform for drug delivery.

**Table S1.** Fitted models for the responses,  $R^2$ , adjusted  $R^2$ , predicted  $R^2$ , model equation, significant model terms and average percent deviation of actual results from predicted results.

| Response            | Model     | $R^2$  | Adjusted $R^2$ | Predicted $R^2$ | Adequacy /precision ratio | Model equation *                                     | Significant model terms    | Average percent deviation (Average $\pm$ SD) |
|---------------------|-----------|--------|----------------|-----------------|---------------------------|------------------------------------------------------|----------------------------|----------------------------------------------|
| Disintegration time | Quadratic | 0.9642 | 0.9355         | 0.8566          | 13.51                     | +4.75-6.00 A-0.75 B -1.25 AB +13.25 A <sup>2</sup>   | A,A <sup>2</sup>           | 14.86 $\pm$ 10.45                            |
| Wetting time        | Quadratic | 0.9999 | 0.9999         | 0.9997          | 235.30                    | +5.50+87.25A+0.00 B +0.00 AB +87.25 A <sup>2</sup>   | A, A <sup>2</sup>          | 9.56 $\pm$ 11.97                             |
| USP Q3              | Quadratic | 0.9981 | 0.9965         | 0.9923          | 51.40                     | +97.41-21.43 A+2.59 B +2.59 AB -18.83 A <sup>2</sup> | A, B, AB, A <sup>2</sup>   | 1.04 $\pm$ 1.35                              |
| USP Q10             | 2FI       | 0.9710 | 0.9564         | 0.9038          | 18.43                     | +98.23-1.83 A +1.54 B +1.48 AB                       | A, B, AB                   | 0.35 $\pm$ 0.32                              |
| SSDT Q2             | Quadratic | 0.9949 | 0.9909         | 0.9797          | 36.77                     | +16.64-4.07 A+0.05 B +0.04 AB -10.17 A <sup>2</sup>  | A, A <sup>2</sup>          | 4.94 $\pm$ 1.90                              |
| SSDT Q10            | Quadratic | 0.9993 | 0.9987         | 0.9971          | 95.63                     | +73.20-31.63 A-5.95B -5.95AB -4.82A <sup>2</sup>     | A, B, AB, A <sup>2</sup> . | 1.53 $\pm$ 1.97                              |
| SFRT                | 2FI       | 0.9999 | 0.9998         | 0.9996          | 259.20                    | +491.08+476.13 A-438.92 B -441.88AB                  | A, B, AB                   | 16.17 $\pm$ 18.7                             |
| SFRF                | Linear    | 0.8990 | 0.8701         | 0.8156          | 12.15                     | +794.58+278.61 A-64.08 B                             | A                          | 11.59 $\pm$ 6.32                             |



**Table S2:** Observed mean, predicted mean and two sided 95 % prediction interval for the optimum formulation.

| Response                               | Observed mean | Predicted mean | Two sided 95 % prediction interval |          |
|----------------------------------------|---------------|----------------|------------------------------------|----------|
|                                        |               |                | low                                | high     |
| Disintegration time (sec)              | 11.5          | 5.58           | -0.45135                           | 11.62572 |
| Wetting time (sec)                     | 5.4           | 3.99           | 1.04696                            | 6.952765 |
| Dissolution USP Q 3 (% released)       | 100           | 95.23          | 91.51128                           | 98.95279 |
| Dissolution USP Q 10 (% released)      | 100           | 96.75          | 95.80229                           | 97.69847 |
| Dissolution modified Q 2 (% released)  | 15.18         | 16.65          | 15.102                             | 18.21615 |
| Dissolution modified Q 10 (% released) | 80.824        | 79.59          | 76.46897                           | 82.72669 |
| SFRT (sec)                             | 906           | 913.93         | 895.5502                           | 932.3202 |
| SFRF (dyne/cm <sup>2</sup> )           | 912           | 853.77         | 690.4656                           | 1017.093 |

**Table S3:** Geometric means, % ratio and 90% confidence intervals for AUC<sub>t</sub>, AUC<sub>inf</sub> and C<sub>max</sub>

| Pharmacokinetic parameter | <u>Geometric means</u> |           | % Ratio  | 90 % Confidence |
|---------------------------|------------------------|-----------|----------|-----------------|
|                           | Test                   | Reference | Test/Ref | Intervals       |
| AUC <sub>t</sub>          | 131.43                 | 99.38     | 132.25   | 98.84 – 176.94  |
| AUC <sub>inf</sub>        | 160.27                 | 114.49    | 139.99   | 112.21 – 174.63 |
| C <sub>max</sub>          | 41.10                  | 30.15     | 136.32   | 106.43 – 174.61 |
